# Supplementary material for: Genome-Wide Transcriptional Analysis Reveals Alternative Splicing Event Profiles in Hepatocellular Carcinoma and Their Prognostic Significance
Source: Front Genet. 2020 Aug 11;11:879. doi: 10.3389/fgene.2020.00879 (PMC7432180; doi:10.3389/fgene.2020.00879)
Supplement: Supplementary file 6 [file Table_1.XLS]

## Sheet: Sheet3
Supplementary Table S1：The detail of the 71 experimentally validated splicing facters .
Splicing Factor	Gene	GeneID	Uniprot	Aliases	Binding Domain(s)	MIM	Protein Interactors	Chemical Interactors	Expression	CLIP
9G8	SFRS7	6432	Q16629	splicing factor arginine/serine-rich 7 35kDa, AAG3, HSSG1, RBM37, ZCRB2, ZCCHC20	1 RRM (RNA recognition motif) domain; 1 CCHC-type zinc finger domain		CDK6, ESR1, GABARAP, GABARAPL1, GABARAPL2, HDGF, IFIT3, MAP1LC3A, MAP1LC3B, NXF1, RBBP6 (IntAct Database); NXF1, SF3A2 (STRING Database); CDC5L, NXF1, SF3A2, SNW1 (MINT Database); CCNL2, CDC2L2, CDK19, CPSF6, DUSP11, NXF1, PCBP2, SFRS12 (HPRD Database, Direct); AMOTL1, ARID1A, C19orf2, CAD, CHTF18, CPSF1, CPSF6, DDX3X, DHX30, DIAPH1, EPRS, GRINL1A, HNRNPK, HNRNPL, HNRNPU, HNRNPUL1, NEDD4, NUDT21,…
CUG-BP1	CUGBP1	10658	Q92879	CUG triplet repeat RNA binding protein 1, CUGBP, NAB50, CUG-BP, hNab50, BRUNOL2.	3 RRM (RNA recognition motif) domains	Myotonic distrophy (DM) [MIM:160900]	FUBP1, PPBP, TOM1L1, USP10 (IntAct Database); FUBP1, HNRNPC, HNRNPH1, MBNL1, PPBP, RALY, TOM1L1 (MINT Database); DMPK, FUBP1, PPBP, TOM1L1 (HPRD Database, Direct); FUBP1, PPBP, TOM1L1, UBC, USP10 (BioGRID Database)
DAZAP1	DAZAP1	26528	Q96EP5	DAZ associated protein 1	2 RRM (RNA recognition motif) domains		GABARAP, GABARAPL1, GABARAPL2, MAP1LC3A, MAP1LC3B, RAD52 (IntAct Database); DAZ1, DAZL (HPRD Database, Direct); CPSF7, EWSR1, ITCH, PABPC1, SF1, SMARCE1, SPG20, UBAP2, UBAP2L (HPRD Database, Complex); DAZ1, DAZL, ITCH, KIAA0101, SUMO2, UBC (BioGRID Database)
ETR-3	CUGBP2	10659	O95319	CUG triplet repeat RNA binding protein 2, NAPOR, BRUNOL3	3 RRM (RNA recognition motif) domains		PCBP1 (IntAct Database); PCBP1 (MINT Database); A1CF, APOBEC1, PCBP1 (HPRD Database, Direct); A1CF, UBC (BioGRID Database)
FMRP	FMR1	2332	Q06787	fragile X mental retardation 1, POF, POF1, FRAXA, MGC87458	2 KH domains	Fragile X syndrome [MIM:300624]. Fragile X tremor/ataxia syndrome (FXTAS) [MIM:300623].	CYFIP1, CYFIP2, ESR1, ESR2, PRKAA1, STAU1 (IntAct Database); CYFIP2, FXR1, FXR2, NUFIP1, NUFIP2 (STRING Database); NUFIP2 (DIP Database); CYFIP1, CYFIP2, EIF2C1, HABP4 (MINT Database); CYFIP1, CYFIP2, FXR1, FXR2, NCL, NUFIP1, NUFIP2, RANBP9, STAU1, UBE2I, YBX1 (HPRD Database, Direct); ELAVL1, ELAVL2, ELAVL3, ELAVL4, GNB2L1, HNRNPAB, HNRNPD, HNRNPF, HNRNPH1, HNRNPH2, HNRNPR, HNRNPU, MYO5A, NCL, PA…
Fox-1	A2BP1	54715	Q9NWB1	ataxin 2-binding protein 1, HRNBP1, FOX1	1 RRM (RNA recognition motif) domain		ATN1, ATXN1, ATXN2, DMRTB1, DVL2, GCA, HNRNPF, HSFX1, KIFAP3, LZTS2, MAGED1, NUMBL, PCBP4, PLEKHA5, PRRC2A, PSMF1, QKI, RBFOX2, RBM24, TNIP1, TNRC4, TSC22D1 (IntAct Database); ATN1, ATXN1, ATXN2, BAT2, DMRTB1, DVL2, GCA, HNRNPF, HSFX2, KIFAP3, LZTS2, MAGED1, NOC2L, NUMBL, PCBP4, PSMF1, QKI, RBM9, RHOXF2, TNIP1, TNRC4 (MINT Database); ATN1, ATXN1, ATXN2, BAT2, DMRTB1, DVL2, GCA, HNRNPF, HSFX1, KIF…
Fox-2	RBFOX2	23543	O43251	RNA binding protein, fox-1 homolog (C. elegans) 2, RTA, fxh, FOX2, RBM9, Fox-2, HNRBP2, HRNBP2, dJ106I20.3	1 RRM (RNA recognition motif) domain		APH1A, ATN1, ATXN1, DAZAP2, ESR1, ESR2, FOX1, MYC, PSMF1, QKI, RBPMS, RERE, RHOXF2, TOLLIP (IntAct Database); ATN1, ATXN1, DAZAP2, DDX5, DMRTB1, ELAVL1, FOX1, GLIS2, HNRNPF, HNRNPH2, HNRNPK, KHDRBS1, PTBP1, QKI, RBM9, RBM22, RBM23, RBM42, RBPMS, RERE, RHOXF2, SF3A1, SMN1, SNRPC, U2AF2 (MINT Database); ATN1, ATXN1, DAZAP2, DMRTB1, ESR1, ESR2, FOX1, QKI, RERE, RBPMS, RHOXF2 (HPRD Database, Direct);…
hnRNP A0	HNRNPA0	10949	Q13151	heterogeneous nuclear ribonucleoprotein A0, HNRPA0.	2 RRM (RNA recognition motif) domains		ARRB2, ATG12, CCT3, ESR1, GABARAP, GABARAPL2, MAP1LC3A, MAP1LC3B, MTNR1A, MYC (IntAct Database); CCT3, CIRBP, DDX5, HNRNPF, HNRNPH2, HNRNPH3, HNRNPK, MAPK6, SFRS1, SNW1, U2AF2 (MINT Database); CCT3, MAPKAPK2, MTNR1A, MTNR1B (HPRD Database, Direct); CDK9, KHDRBS2, KIAA0101, MAPK6, MEPCE, MYC, UBC (BioGRID Database)
hnRNP A1	HNRNPA1	3178	P09651	heterogeneous nuclear ribonucleoprotein A1, HNRPA1, MGC102835	2 RRM (RNA recognition motif) domains		ACTB, ARRB1, ARRB2, DHRS2, EIF4A3, ESR1, GABARAP, GABARAPL1, GABARAPL2, GRB2, H2AFX, HMGA1, HNRNPC, IFIT2, IFIT3, MAP1LC3A, MAP1LC3B, MAP3K14, MAPK13, NR0B2, PHYHIP, RBM8A, RIPK3, RPL21, TFEC, TOP1, UPF3A, UPF3B, XRN1 (IntAct Database); KHSRP, PRMT1, SF3A2 (STRING Database); TNPO1 (DIP Database); BAT2, BAT5, EIF2C1, EIF2C2, EIF4E, HNRNPH3, KHDRBS1, MAP3K14, NCBP1, PPIL1, RIPK3, RPL21, SF3A2, SNW1…
hnRNP A2/B1	HNRNPA2B1	3181	P22626	heterogeneous nuclear ribonucleoprotein A2/B1, HNRPA2B1, RNPA2, HNRPA2, HNRPB1, SNRPB1, HNRNPA2, HNRNPB1, FLJ22720, DKFZp779B0244.	2 RRM (RNA recognition motif) domains		ACTB, ATG16L1, CDKN2A, ERG, ESR1, GABARAP, GABARAPL1, GABARAPL2, GRB2, HDGF, IFIT2, IFIT3, IQCB1, LIN37, LIN54, MAP1LC3A, MAP1LC3B, MAP1LC3C, MAX, RB1CC1, SMN1, TOB1, TOP1, ULK2 (IntAct Database); SF3A2 (STRING Database); C7orf36, CDC5L, DHX9, MAP4K2, NR4A1, RBM3, SF3A2, SNW1, YWHAZ, ZMAT3, ZMYM2 (MINT Database); CSNK2A1, HNRNPL, SFRS12, SNRNP70, TTF2, VHL, ZMYM2 (HPRD Database, Direct); DDX17, D…
hnRNP C	HNRNPC	3183	P07910	heterogeneous nuclear ribonucleoprotein C (C1/C2), C1, C2, HNRPC, SNRPC, MGC104306, MGC105117, MGC117353, MGC131677	1 RRM (RNA recognition motif) domain		ALYREF, AP1M1, ARRB2, BTRC, CCDC85B, CDKN2A, CNBP, DDX21, EIF2C4, EIF4A3, FAS, FXR2, GABARAP, GABARAPL1, GABARAPL2, GH1, H2AFX, HNRNPA1, IFIT1, IKBKE, KHDRBS3, KPNA2, KPNA3, KRAS, LMO3, MAP1LC3A, MAP1LC3B, MYC, NFKB2, PHKB, PIN1, PUF60, RALYL, RBM41, RBM8A, SMARCD1, TNFRSF1B, TOP1, TRAF6, UBE2I, UPF3A, ZNF581 (IntAct Database); KPNA3, RALYL (STRING Database); BJLF1, ILF3 (DIP Database); AP1M1, CC…
hnRNP C1	HNRNPC	3183	P07910-2	heterogeneous nuclear ribonucleoprotein C (C1/C2), C1, C2, HNRPC, SNRPC, MGC104306, MGC105117, MGC117353, MGC131677	1 RRM (RNA recognition motif) domain		ALYREF, AP1M1, ARRB2, BTRC, CCDC85B, CDKN2A, CNBP, DDX21, EIF2C4, EIF4A3, FAS, FXR2, GABARAP, GABARAPL1, GABARAPL2, GH1, H2AFX, HNRNPA1, IFIT1, IKBKE, KHDRBS3, KPNA2, KPNA3, KRAS, LMO3, MAP1LC3A, MAP1LC3B, MYC, NFKB2, PHKB, PIN1, PUF60, RALYL, RBM41, RBM8A, SMARCD1, TNFRSF1B, TOP1, TRAF6, UBE2I, UPF3A, ZNF581 (IntAct Database); KPNA3, RALYL (STRING Database); BJLF1, ILF3 (DIP Database); AP1M1, CC…
hnRNP C2	HNRNPC	3183	P07910-1	heterogeneous nuclear ribonucleoprotein C (C1/C2), C1, C2, HNRPC, SNRPC, MGC104306, MGC105117, MGC117353, MGC131677	1 RRM (RNA recognition motif) domain		ALYREF, AP1M1, ARRB2, BTRC, CCDC85B, CDKN2A, CNBP, DDX21, EIF2C4, EIF4A3, FAS, FXR2, GABARAP, GABARAPL1, GABARAPL2, GH1, H2AFX, HNRNPA1, IFIT1, IKBKE, KHDRBS3, KPNA2, KPNA3, KRAS, LMO3, MAP1LC3A, MAP1LC3B, MYC, NFKB2, PHKB, PIN1, PUF60, RALYL, RBM41, RBM8A, SMARCD1, TNFRSF1B, TOP1, TRAF6, UBE2I, UPF3A, ZNF581 (IntAct Database); KPNA3, RALYL (STRING Database); BJLF1, ILF3 (DIP Database); AP1M1, CC…
hnRNP D	HNRNPD	3184	Q14103	heterogeneous nuclear ribonucleoprotein D (AU-rich element RNA binding protein 1, 37kDa), P37, AUF1, AUF1A, HNRPD.	2 RRM (RNA recognition motif) domains		ACTB, ARRB2, ESR1, EXOSC2, GABARAP, GABARAPL1, GABARAPL2, H2AFX, HMGA1, IFIT2, IFIT3, LDHAL6B, MAP1LC3A, MAP1LC3B, UBE2I (IntAct Database); EIF4G1, PABPC1, SYNCRIP (STRING Database); HNRNPC, HNRNPF, HNRNPH3, HNRNPK, HNRNPU, MAPK6, PABPC1, PTBP1, PTBP2, RALY, SF3B4, SFN, SNRPC, SNW1, U2AF2, YWHAH (MINT Database); CSDE1, EXOSC4, GSK3B, IGF2BP2, LDHA, LSM5, PABPC1, PCBP1, PCBP2, PCSK7, PRKACA, SAFB,…
hnRNP D0	HNRNPD	3184	Q14103	heterogeneous nuclear ribonucleoprotein D (AU-rich element RNA binding protein 1, 37kDa), P37, AUF1, AUF1A, HNRPD.	2 RRM (RNA recognition motif) domains		ACTB, ARRB2, ESR1, EXOSC2, GABARAP, GABARAPL1, GABARAPL2, H2AFX, HMGA1, IFIT2, IFIT3, LDHAL6B, MAP1LC3A, MAP1LC3B, UBE2I (IntAct Database); EIF4G1, PABPC1, SYNCRIP (STRING Database); HNRNPC, HNRNPF, HNRNPH3, HNRNPK, HNRNPU, MAPK6, PABPC1, PTBP1, PTBP2, RALY, SF3B4, SFN, SNRPC, SNW1, U2AF2, YWHAH (MINT Database); CSDE1, EXOSC4, GSK3B, IGF2BP2, LDHA, LSM5, PABPC1, PCBP1, PCBP2, PCSK7, PRKACA, SAFB,…
hnRNP DL	HNRPDL	9987	O14979	heterogeneous nuclear ribonucleoprotein D-like, JKTBP, JKTBP2, laAUF1.	2 RRM (RNA recognition motif) domains		ATIC, ERG, GABARAP, GABARAPL1, GABARAPL2, H2AFX, HMGA1, IFIT2, IFIT3, MAP1LC3A, MAP1LC3B, TRAF6 (IntAct Database); ICT1 (MINT Database); ATIC, H2AFX, HGS, HNRNPA1, ICT1, KHDRBS2, KIAA0101, UBC, VHL (BioGRID Database)
hnRNP E1	PCBP1	5093	Q15365	poly(rC) binding protein 1, HNRPX, HNRPE1, hnRNP-X, hnRNP-E1.	3 KH domains		ACTR6, ANP32A, BCAR3, CAV3, CELF2, EIF1B, ERG, EWSR1, GABARAP, GABARAPL1, GH1, GSTK1, HLA-B, HLA-C, HMGA1, HNRNPK, HNRPLL, IKBKE, MATR3, MYC, NME2, NOVA1, PCBP2, PCBP4, PDLIM7, PTBP1, PUF60, QKI, RALY, RBM11, RBM42, SRSF3, TNIK, TNRC4, TRAF6, TSC22D1, TSC22D4, UGP2, VHL, WBP11, WRAP73 (IntAct Database); SF3A2 (STRING Database); CDC5L, CUGBP2, EWSR1, HNRNPK, HNRPLL, MATR3, NOVA1, PABPC1, PCBP2, PC…
hnRNP E2	PCBP2	5094	Q15366	poly(rC) binding protein 2, HNRPE2, hnRNP-E2, MGC110998.	3 KH domains		GABARAPL1, MYC, PCBP1, QKI (IntAct Database); HNRNPL (STRING Database); CDC5L, CPSF1, CPSF2, CPSF3, EIF2C1, HNRNPL, MORG1, NKAP, PABPC1, PAPOLA, PCBP2, PCBP1, PRPF40A, QKI, SF3B2, SFRS3, SLU7, SNW1, SYMPK, WDR77 (MINT Database); CSDA, CNBP, FLNA, HNRNPD, HNRNPK, HNRNPL, PABPC1, PCBP1, PCBP2, PRPF40A, PTBP1, QKI, SFRS3, SFRS7, YBX1 (HPRD Database, Direct); CDK9, H2AFX, HDAC5, HNRNPD, HNRNPK, HNRNP…	Cytosine (STITCH Database); Cytosine (ProtChemSIDatabase)
hnRNP F	HNRNPF	3185	P52597	heterogeneous nuclear ribonucleoprotein F, HNRPF, mcs94-1, MGC110997, OK/SW-cl.23, HNRNPF	3 RRM (RNA recognition motif) domains		ARRB2, EGFR, ESR1, GABARAP, GABARAPL1, GABARAPL2, GRB2, IQCB1, MAP1LC3A, MAP1LC3B, MYC, NDRG1, PPP2R2B, RBFOX1, TGM2, TOB1, VAV2, ZWINT (IntAct Database); ZWINT (STRING Database); CDC5L, EIF2C1, EIF2C2, FOX1, HNRNPA0, HNRNPD, HNRNPH3, HNRNPUL1, NFKB1, RBM4, RBM9, SF1, SF3B4, SNRPC, SNW1, TOE1, YWHAZ (MINT Database); FOX1, HNRNPH1, NCBP1, NCBP2, NDRG1, POLR2A, SUMO4, TXNL4A, ZNF689 (HPRD Database,…
hnRNP H1	HNRNPH1	3187	P31943	heterogeneous nuclear ribonucleoprotein H1 (H), HNRPH, HNRPH1, hnRNPH, DKFZp686A15170	3 RRM (RNA recognition motif) domains		ACTB, ARRB1, ARRB2, CRMP1, EGFR, GABARAP, GABARAPL1, GABARAPL2, GRB2, IKBKE, MAP1LC3A, MAP1LC3B, MAP3K3, NDRG1, NFKB2, PPP2R2B, REL, RIPK3, SMN1, TAB2, TOB1, TOM1L1, ZWINT (IntAct Database); HNRNPH2, HNRNPK, KHSRP, YTHDF2, ZWINT (STRING Database); CDC5L, CRMP1, CUGBP1, DDX5, HNRNPH3, IKBKE, MAP3K3, MAP3K7IP2, MBNL1, NFKB2, RALY, RIPK3, SF1, SF3B4, SNW1, TOM1L1, YWHAG (MINT Database); CRMP1, HNRNP…
hnRNP H2	HNRNPH2	3188	P55795	heterogeneous nuclear ribonucleoprotein H2 (H'), FTP3, HNRPH', HNRPH2, hnRNPH'	3 RRM (RNA recognition motif) domains		ARRB2, ESR2, GABARAP, GABARAPL1, GABARAPL2, GRB2, MAP1LC3A, MAP1LC3B, TOB1 (IntAct Database); HNRNPH1 (STRING Database); DDX5, EIF2C1, GNB2L1, HNRNPA0, HNRNPUL1, ILF3, MORG1, PQBP1, PRPF31, PRPF8, QKI, RBM10, RBM39, RBM4, RBM9, SF1, SNRPC, YWHAZ (MINT Database); ELAVL1, ELAVL2, ELAVL3, ELAVL4, FMR1, GNB2L1, HNRNPAB, HNRNPD, HNRNPF, HNRNPH1, HNRNPK, HNRNPR, HNRNPU, NCL, PABPC1, PTBP1, RBMX, SF3B2,…
hnRNP H3	HNRNPH3	3189	P31942	heterogeneous nuclear ribonucleoprotein H3 (2H9), hnRNP 2H9, HNRPH3, FLJ34092	2 RRM (RNA recognition motif) domains		ANXA11, C14orf1, CCL13, CRMP1, EEF1G, GABARAP, GABARAPL1, GABARAPL2, GSTK1, H2AFX, KAT5, MAP1LC3A, MAP1LC3B, PIM2, RPS4X, SMN1, STK24, TOB1, TTR, UTP14A (IntAct Database); ANXA11, C14orf1, CCL13, CHERP, CRMP1, DDX17, DDX5, EEF1G, HNRNPA0, HNRNPA1, HNRNPD, HNRNPF, HNRNPH1, HNRNPU, HNRNPUL1, KAT5, MAPK6, PIM2, RBM4, RPS4X, TTR, UTP14A, ZMYM2 (MINT Database); ANXA11, C14orf1, CCL13, CRMP1, EEF1G, KA…
hnRNP I (PTB)	PTBP1	5725	P26599	polypyrimidine tract binding protein 1, PTB, PTB2, PTB3, PTB4, pPTB, PTB-1, PTB-T, MGC8461, MGC10830, HNRPI, HNRNPI, HNRNP-I.	4 RRM (RNA recognition motif) domains		ARRB2, GABARAP, GABARAPL1, GABARAPL2, HMGA1, MAP1LC3A, MAP1LC3B, MED10, MED19, MED29, MYC, PCBP1, PCBP3, QKI, SFPQ (IntAct Database); HNRNPL, SFPQ (STRING Database); CDC5L, ELAVL1, HNRNPAB, HNRNPD, NPM1, PCBP1, PCBP3, QKI, RBM10, RBM9, SFPQ, SNRPA, SNW1, YWHAZ, ZMYM2 (MINT Database); CALCOCO2, CASP3, FUS, HNRNPL, PCBP1, PCBP2, PCBP3, PRKACA, QKI, RAVER1, RAVER2, SFPQ, SNRPA, ZMYM2 (HPRD Database,…
hnRNP J	HNRNPK	3190	P61978	heterogeneous nuclear ribonucleoprotein K, CSBP, TUNP, HNRPK, FLJ41122	3 KH domains		ARRB1, ARRB2, BTRC, CDKN1A, CNNM3, DIDO1, EGFR, ESR1, GABARAP, GABARAPL1, GABARAPL2, GFI1B, GRAP2, GRB2, HCK, KHDRBS1, KHDRBS2, KHDRBS3, MAP1LC3A, MAP1LC3B, MAPK13, MATR3, MDM2, MYC, NCK2, NPDC1, PCBP1, PELI2, QKI, RBM41, RBM42, RBM7, RBMX, SMAD3, SORBS3, TOB1, TOP1, TP63, UBE2I (IntAct Database); HNRNPH1, HNRNPL, KHDRBS2, PRMT1, RBMX, SF3A2, SRC, VAV1 (STRING Database); CCAR1, CDC5L, CIRBP, CTNN…
hnRNP K	HNRNPK	3190	P61978	heterogeneous nuclear ribonucleoprotein K, CSBP, TUNP, HNRPK, FLJ41122	3 KH domains		ARRB1, ARRB2, BTRC, CDKN1A, CNNM3, DIDO1, EGFR, ESR1, GABARAP, GABARAPL1, GABARAPL2, GFI1B, GRAP2, GRB2, HCK, KHDRBS1, KHDRBS2, KHDRBS3, MAP1LC3A, MAP1LC3B, MAPK13, MATR3, MDM2, MYC, NCK2, NPDC1, PCBP1, PELI2, QKI, RBM41, RBM42, RBM7, RBMX, SMAD3, SORBS3, TOB1, TOP1, TP63, UBE2I (IntAct Database); HNRNPH1, HNRNPL, KHDRBS2, PRMT1, RBMX, SF3A2, SRC, VAV1 (STRING Database); CCAR1, CDC5L, CIRBP, CTNN…
hnRNP L	HNRNPL	3191	P14866	heterogeneous nuclear ribonucleoprotein L, HNRPL, FLJ35509, P/OKcl.14	3 RRM (RNA recognition motif) domains		CFLAR, CSE1L, CSNK2A1, DFFA, DOCK4, EIF2B1, FGFR3, GABARAP, GABARAPL1, GABARAPL2, HMGA1, HMG20B, IFIT2, IFIT3, ILK, MAP1LC3A, MAP1LC3B, PJA1, PPP2R2B, PUF60, RARA, SGK1, SMYD2, SSSCA1, TMBIM4, TNFRSF14, TOP1, TP63, TRAF6, YWHAZ, ZNF143 (IntAct Database); HNRNPK, PCBP2, PTBP1 (STRING Database); CSE1L, EIF2C1, FGFR3, HMG20B, PCBP2, PJA1 (MINT Database); APEX1, CSE1L, FGFR3, HMG20B, HNRNPA2B1, HNRNP…
hnRNP LL	HNRPLL	92906	Q8WVV9	heterogeneous nuclear ribonucleoprotein L-like, SRRF, hnRNPLL, HNRPLL.	3 RRM (RNA recognition motif) domains		DDX39B, PCBP1 (IntAct Database); BAT1, PCBP1 (MINT Database); BAT1, PCBP1 (HPRD Database, Direct); HDAC5, PSMA3, UBC, VHL (BioGRID Database)
hnRNP M	HNRNPM	4670	P52272	heterogeneous nuclear ribonucleoprotein M, HTGR1, NAGR1, HNRPM4, HNRNPM4, DKFZp547H118.	3 RRM (RNA recognition motif) domains		ARF6, ARRB1, ARRB2, C20orf24, ERG, ESR1, GABARAP, GABARAPL1, GABARAPL2, GSTK1, HLA-B, IKBKE, LMO2, LMO3, MAGEB2, MAP1LC3A, MAP1LC3B, MAP3K1, MAP3K14, MED19, MED26, MED29, NFKB2, NFKBIB, PHLDA3, PRRC2A, PTP4A3, RBM4B, RELA, RFXANK, SGK1, STAT3, TANK, TBK1, TNFRSF10D, TSC22D1 (IntAct Database); TNPO1 (STRING Database); TNPO1 (DIP Database); BAG2, BAT2, CDC5L, HSPA1A, HSPA8, MAP3K1, MAP3K14, NFKB1, …
hnRNP P (TLS)	FUS	2521	P35637	fusion (involved in t(12,16) in malignant liposarcoma), hnRNP-P2, TLS, CHOP, FUS1, FUS-CHOP, TLS/CHOP.	1 RRM (RNA recognition motif) domain; 1 RanBP2-type zinc finger.	Malignant myxoid liposarcoma. Acute myeloid leukemia (AML) [MIM:601626]. Angiomatoid fibrous histioc	ARHGDIA, BCAR3, EIF1B, EIF6, ESR1, ESRRA, EWSR1, GABARAP, GABARAPL1, GABARAPL2, GRB2, GSK3B, HLA-B, KHDRBS3, LYAR, MAGEB2, MAP1LC3A, MAP1LC3B, MAPK13, MAX, MDH1, NKD2, PRMT1, PSMB7, RBMX, SAFB2, SRSF9, TAF15, TDRD3, TNIP1, TP63, USF2 (IntAct Database); PRMT1, SF3A2, SRSF10 (STRING Database); CDC5L, PRMT1, SF3A2, SFPQ, SFRS13A, SNW1, WBP4, ZMYM2 (MINT Database); GRIN1, GRIN2D, ILF3, POLR2A, PRMT1,…
hnRNP U	HNRNPU	3192	Q00839	heterogeneous nuclear ribonucleoprotein U (scaffold attachment factor A), HNRPU, SAF-A, U21.1.	1 SAP domain		ARRB1, ARRB2, CDKN2A, ERG, ESR1, GABARAP, GABARAPL1, GABARAPL2, HDGF, IFIT3, IKBKB, IKBKG, MAP1LC3A, MAP1LC3B, MAP3K14, NDRG1, NFKB2, NFKBIB, RELA, RELB, STAU1, TANK, TNFRSF1B, TOP1 (IntAct Database); CDK7, POLR2A, SF3A2, STAU1 (STRING Database); CD5, CENPA, PLCG1 (DIP Database); CDC5L, EIF2C1, EIF2C2, GAS7, HNRNPD, HNRNPH3, IKBKB, IKBKG, MAP3K14, NFKB2, PITX2, RELA, RELB, SFN, SMN1, SNW1, SYNCRI…	Imatinib (IntAct Database)
HTra2alpha	TRA2A	29896	Q13595	transformer-2 alpha, HSU53209.	1 RRM (RNA recognition motif) domain		CDK6, GABARAP, GABARAPL1, GABARAPL2, LBP, MAP1LC3A, MAP1LC3B, NXF1, TAF9, YTHDC1 (IntAct Database); CDK2AP2, CRABP1, DHX15, NUDT21, SELENBP1, SMAP, SR140, TNNT1, YWHAG (MINT Database); SFRS13A, YWHAG (HPRD Database, Direct); C11ORF58, CDK2AP2, CRABP1, NUDT21, SELENBP1, TADA2A, TNNT1, UBC, YWHAG (BioGRID Database)
HTra2beta1	TRA2B	6434	P62995	splicing factor arginine/serine-rich 10 (transformer 2 homolog, Drosophila), SFRS10, TRAN2B, TRA2-BETA, Htra2-beta, DKFZp686F18120	1 RRM (RNA recognition motif) domain		CDK6, IVNS1ABP, LUM, NXF1, RNPS1, YTHDC1, YWHAG, YWHAZ (IntAct Database); RBMX, RNPS1, SF3A2 (STRING Database); RBMX, SRSF9 (DIP Database); HNRNPA1, RBMX, SF3A2, SFRS13A, SFRS2, SFRS3, SFRS4, SFRS6, YWHAG, YWHAZ (MINT Database); IVNS1ABP, LUM, NGFR, RBMX, RBMXL2, RBMY1A1, RNPS1, SFRS9, SFRS12, TNPO3, YTHDC1, YWHAG, YWHAZ (HPRD Database, Direct); BANF1, KIAA0101, POU5F1, RBM39, RBMX, RNPS1, SREK1,…
HuB	ELAVL2	1993	Q12926	ELAV (embryonic lethal abnormal vision Drosophila)-like 2 (Hu antigen B), HELN1, HEL-N1, HELN2, HEL-N2.	3 RRM (RNA recognition motif) domains		ELAVL3, ELAVL4 (HPRD Database, Direct); ELAVL1, ELAVL3, ELAVL4, FMR1, GNB2L1, HNRNPAB, HNRNPD, HNRNPF, HNRNPH1, HNRNPH2, HNRNPK, HNRNPR, HNRNPU, NCL, PABPC1, PTBP1, RBMX, SF3B2, STAU1, SYNCRIP, UPF1 (HPRD Database, Complex); HNRNPAB, HOXC9, KIAA0101, NR2E3, RBFOX2, UBC (BioGRID Database)
HuD	ELAVL4	1996	P26378	ELAV (embryonic lethal abnormal vision Drosophila)-like 4 (Hu antigen D), PNEM.	3 RRM (RNA recognition motif) domains	Paraneoplastic encephalomyelitis sensory neuropathy [MIM:168360]	EWSR1, PHF20L1 (IntAct Database); EWSR1 (MINT Database); ELAVL2, EWSR1, GAP43, NFX1 (HPRD Database, Direct); ELAVL1, ELAVL2, ELAVL3, FMR1, GNB2L1, HNRNPAB, HNRNPD, HNRNPF, HNRNPH1, HNRNPH2, HNRNPK, HNRNPR, HNRNPU, KIF3A, NCL, PABPC1, PTBP1, RBMX, SF3B2, STAU1, SYNCRIP, UPF1 (HPRD Database, Complex); EWSR1, NXF1 (BioGRID Database)
HuR	ELAVL1	1994	Q15717	ELAV (embryonic lethal abnormal vision Drosophila)-like 1 (Hu antigen R), Hua, MelG, ELAV1	3 RRM (RNA recognition motif) domains		GABARAP, GABARAPL1, GABARAPL2, GJB3, H2AFX, MAP1LC3A, MAP1LC3B, NOS3, PPP2R2B, TOP1 (IntAct Database); CDC5L, EIF2C1, EIF2C2, HNRNPK, PTBP1, PTBP2, RBM9, RPS27A, SNW1, YWHAQ (MINT Database); ANP32A, ANP32B, CARM1, KPNA1, KPNB1, PAIP2, SET, SFRS12, TNPO1, TNPO2 (HPRD Database, Direct); ANP32A, ANP32B, DCP1A, DCP1B, DCP2, DDX17, DDX23, DDX5, DHX9, EFTUD2, FBL, H1FX, HIST1H1C, HNRNPA1, HNRNPA2B1, HN…
KSRP	KHSRP	8570	Q92945	KH-type splicing regulatory protein, FBP2, FUBP2, MGC99676.	4 KH domains		ARF6, BCAR3, EXOSC2, GABARAP, GABARAPL1, GABARAPL2, GRB2, MAP1LC3A, PUF60, TRAF6 (IntAct Database); HNRNPA1, HNRNPH1 (STRING Database); AKT1 (DIP Database); GADD45A, GSK3B, STK3 (MINT Database); A1CF, BACE1, EXOSC2, EXOSC3, PARN (HPRD Database, Direct); EXOSC2, EXOSC3, FUBP1, HNRNPF, HNRNPH1, PARN, PTBP1 (HPRD Database, Complex); A1CF, APBB1, EXOSC2, GADD45A, GSK3B, HNRNPA1, HNRNPH1, KIAA0101, PA…
MBNL1	MBNL1	4154	Q9NR56	muscleblind-like (Drosophila), EXP, MBNL, EXP35, EXP40, EXP42, KIAA0428, DKFZp686P06174.	4 C3H1-type zinc fingers	Muscular dystrophy [MIM:606516]	ABI3BP, IDH3A, ZNHIT3 (IntAct Database); CUGBP1, HNRNPH1 (MINT Database); UBC (BioGRID Database)
Nova-1	NOVA1	4857	P51513	neuro-oncological ventral antigen 1.	3 KH domains	Autoantigen in the paraneoplastic opsoclonus myoclonus ataxia (POMA) [MIM:602157]	PCBP1, SMARCC2 (IntAct Database); PCBP1, RPP14, SMARCC2 (MINT Database); PCBP1, SMARCC2 (HPRD Database, Direct); RPP14 (BioGRID Database)
Nova-2	NOVA2	4858	Q9UNW9	neuro-oncological ventral antigen 2, ANOVA, NOVA3.	3 KH domains	Autoantigen in the paraneoplastic opsoclonus myoclonus ataxia (POMA) [MIM:601991]
nPTB	PTBP2	58155	Q9UKA9	polypyrimidine tract binding protein 2, PTBLP, brPTB, nPTB5, nPTB6, nPTB7, nPTB8, FLJ34897.	4 RRM (RNA recognition motif) domains		CALCOCO2, EIF5A2, PCBP3, QKI, RBM10, TOM1 (IntAct Database); CALCOCO2, CDC5L, ELAVL1, HNRNPAB, HNRNPC, HNRNPD, KHDRBS1, KHDRBS3, MATR3, PUF60, QKI, RBM10, RBM4, SNRPA (MINT Database); CALCOCO2, PCBP3, PTBP2, QKI, RBM10 (HPRD Database, Direct); CALCOCO2, FUS, KHSRP, KIAA0101, RBM10, UBC (BioGRID Database)
PSF	SFPQ	6421	P23246	splicing factor proline/glutamine-rich (polypyrimidine tract binding protein associated), POMP100.	2 RRM (RNA recognition motif) domains	Papillary renal cell carcinoma (PRCC) [MIM:605074]	ARRB2, BTK, EXOSC5, GABARAP, GABARAPL1, GABARAPL2, HN1, MAP1LC3A, MAP1LC3B, MAP3K14, MAPK13, NFKB2, NFKBIB, NFKBIE, NONO, PSPC1, PTBP1, RAC1, RELA, RELB, RNF43, SIN3A, SMN1, SNRPA, SNRNP70, TBK1, TOP1, TRAF1, TSC1, UBB (IntAct Database); NONO, PSPC1, PTBP1, SIN3A, TOP1 (STRING Database); CD2BP2, CDC5L, FUS, GAS7, HN1, MAP3K14, NFKB1, NFKB2, PTBP1, PTK6, SMAD5, SNW1, RELA, RELB, TBK1, TRAF1, WBP4,…	Ni (IntAct Database)
RBM25	RBM25	58517	P49756	RNA binding motif protein 25, S164, RNPC7, RED120, fSAP94, MGC105088, MGC117168.	1 RRM (RNA recognition motif) domain; 1 PWI domain		ESR2, PPP2R2B (IntAct Database); SF3A2 (STRING Database); PRPF31, RBM23, RBM39, SART1, SF3A2 (MINT Database); BRD4, HDAC5, JMJD6, KIAA0101, RBM39, RNPS1, SRRM1, SUMO2, UBC (BioGRID Database)
RBM4	RBM4	5936	Q9BWF3	RNA binding motif protein 4, LARK, RBM4A, ZCRB3A, ZCCHC21, MGC75138, DKFZp547K0918.	2 RRM (RNA recognition motif) domains; 1 CCHC-type zinc finger		AQR, CDC5L, CXorf56, DDX17, DDX5, DGCR14, DHX9, EIF2C2, HNRNPF, HNRNPH2, HNRNPH3, HNRNPK, HNRNPM, HNRNPUL1, PABPC1, PRPF31, PTBP2, RBM10, RBM22, RBM23, RBM42, RBM7, SF1, SF3B4, SMAD5, SNRPC, SNW1, U2AF2 (MINT Database); CCNA1, LRP2BP, SMAD5 (HPRD Database, Direct); CCNA1, CDK2, EIF2C2, KIAA0101, TRIB3, UBC (BioGRID Database)
Sam68	KHDRBS1	10657	Q07666	KH domain containing RNA binding signal transduction associated 1, p62, FLJ34027.	1 KH domain		ACTB, AZIN1, CBL, CBX6, CREB3L3, CREBBP, CRK, CRKL, EFEMP1, EIF2C1, EMG1, EP300, ESR1, ESR2, FYN, GPHN, GRB2, HCK, HNRNPK, JAK3, LCK, LYN, MAP1LC3A, PIK3R3, PLCG1, POT1, PTPN6, RASA1, RBMX, SCG5, SMARCA2, SRC, SSFA2, STAT3, STUB1, TBL1X, TNS3, TOB1, TUBB4A (IntAct Database); CRK, FNBP4, FYN, GRAP2, GRB2, HCK, INSR, ITK, LCK, LYN, NCK1, PIK3R1, PIK3R2, PLCG1, PRMT1, RASA1, SRC, WBP4 (STRING Databa…
SAP155	SF3B1	23451	O75533	splicing factor 3b, subunit 1, 155kDa, PRP10, PRPF10, SAP155, SF3b155, SF3B1.	11 HEAT repeats		ARF6, ARRB2, ATG12, BRF2, CFLAR, CSNK2A1, ESR1, GABARAP, GSK3B, HDAC3, IKBKE, MYC, PUF60, RNPS1, SMNDC1, SNRNP40, SNRPN, TOP1, YWHAG, YWHAZ (IntAct Database); CDC5L, DDB1, DDX42, PHF5A, PRPF6, SF3A2, SF3B2, SF3B3, SF3B4, SF3B5, SF3B14, TCERG1 (STRING Database); RBM17 (DIP Database); CDC5L, DBP, EIF2C1, EIF2C2, NUDT21, PLRG1, PPP1CA, RBM17, SF3A2, SF3B14, SF3B2, SF3B3, SMAD1, SMAD5, SMAD9, SMAP, S…
SC35	SFRS2	6427	Q01130	splicing factor arginine/serine-rich 2, SC-35, SFRS2A, SRp30b, PR264.	1 RRM (RNA recognition motif) domain		AIRE, CDK6, CIR1, CSNK2A1, ESR1, ESR2, GABARAPL2, HDGF, MAP1LC3A, POLDIP3, RNPS1, UBQLN4 (IntAct Database); CIR1, SF3A2, SREK1, U2AF1 (STRING Database); HABP4, HDAC6, HNRNPM, KAT5, SF3A2, SFRS3, SFRS4, SNW1, SRPK1, SRPK2, TRA2B, U2AF1, UBQLN4 (MINT Database); ADAP1, CCNL1, CCNL2, CDK12, CIR1, FUS, NCF1, SFRS2IP, SFRS11, SFRS12, SIP1, SNRNP70, U2AF1, UBQLN4, YTHDC1, ZRANB2, ZRSR2 (HPRD Database, D…
SF1	SF1	7536	Q15637	splicing factor 1, ZFM1, ZNF162, D11S636.	1 CCHC-type zinc finger; 1 KH domain		DDX17, ESR1, PLSCR1, RBPMS, TRIM23, U2AF2, WWP2 (IntAct Database); PRPF40A, SF3A2, TCERG1, U2AF2 (STRING Database); RBM17 (DIP Database); BCAS2, CD2BP2, DDX17, EFTUD2, HNRNPF, HNRNPH1, HNRNPH2, HNRNPK, HNRNPUL1, ILF3, MORG1, RBM10, RBM17, RBM4, RBM7, SF3A1, SF3A2, SF3B4, U2AF2, WDR77 (MINT Database); BCL2, DDX17, EWSR1, FUS, PLSCR1, PRKG1, PRPF40A, RBPMS, TAF15, TCERG1, TRIM23, U2AF2, WWP2 (HPRD …
SF2/ASF	SFRS1	6426	Q07955	splicing factor arginine/serine-rich 1 (splicing factor 2, alternate splicing factor), ASF, SF2, SF2p33, SRp30a, MGC5228.	2 RRM (RNA recognition motif) domains		BCL10, CDK6, CIR1, DIDO1, ESR1, GABARAP, GABARAPL1, GABARAPL2, HDGF, LNX1, LUC7L3, MAP1LC3A, MAP1LC3B, NFYA, NXF1, RNPS1, RP9, SRPK1, TOP1, U2AF1, U2AF2, YWHAG, YWHAQ (IntAct Database); ADRM1, CLK1, PSMD7, SF3A2, SNRNP70, SRPK1, SRPK2, TOP1, U2AF1, UCHL5, USP14 (STRING Database); U2AF2 (DIP Database); CDC5L, HNRNPA0, LNX1, NPM1, RNPS1, SF3A2, SFRS13A, SFRS4, SNW1, U2AF2 (MINT Database); C1QBP, C2…
SLM-1	KHDRBS2	202559	Q5VWX1	KH domain containing RNA binding signal transduction associated 2, SLM1, FLJ38664, MGC26664, bA535F17.1.	1 KH domain		CBX4, EWSR1, HNRNPK, KHDRBS3, RBMX (IntAct Database); HNRNPK, PRMT1, RBMX (STRING Database); EWSR1, HNRNPK, KHDRBS3, RBMX (MINT Database); EWSR1, GRB2, HNRNPK, KHDRBS3, PRMT1, RBMX, YTHDC1 (HPRD Database, Direct); ARID2, DDX5, DDX17, DEK, DSG1, EHBP1, EWSR1, FBXW11, FGA, FGB, FGG, HNRNPA0, HNRNPA1, HNRNPA2B1, HNRNPC, HNRNPD, HNRNPH1, HNRNPH3, HNRNPK, HNRNPK, HNRNPL, HNRNPR, HNRNPUL2, HNRPDL, HRNR…
SLM-2	KHDRBS3	10656	O75525	KH domain containing RNA binding signal transduction associated 3, Etle, SALP, SLM2, TSTAR, T-STAR, etoile.	1 KH domain		BAHD1, CCDC33, COBRA1, FUS, HNRNPC, HNRNPK, KHDRBS2, LNX1, NUDT18, PSMF1, RBBP6, RBM7, RBMX, SGSM2, SIAH1, ZNF408 (IntAct Database); CCDC33, PSMF1, RBM7, SIAH1 (STRING Database); BAHD1, CCDC33, HNRNPK, HNRNPK, KHDRBS1, KHDRBS2, LNX1, NUDT18, PSMF1, PTBP2, RBM7, RBMX, SGSM2, SIAH1, SNRPC, U2AF2, ZNF408 (MINT Database); BAHD1, CCDC33, HNRNPK, KHDRBS1, KHDRBS2, LNX1, NUDT18, PRMT1, PSMF1, RBM7, RBMX…
SRp20	SFRS3	6428	P84103	splicing factor arginine/serine-rich 3.	1 RRM (RNA recognition motif) domain		ESR1, GABARAP, GABARAPL1, GABARAPL2, HDGF, IFIT3, MAP1LC3A, MED19, MED29, PCBP1, YWHAB, YWHAG, YWHAQ (IntAct Database); SF3A2, SREK1 (STRING Database); NXF1, PCBP1, PCBP2, PRPF38A, RBMY2FP, SF3A2, SFRS2, SNW1, TRA2B (MINT Database); CHD1, EXOSC6, HNRNPK, NXF1, PCBP1, PCBP2, RBM7, RBMY1A1, SFRS2IP, SFRS12, SIP1, SRPK1, YWHAB, YWHAG, YWHAQ (HPRD Database, Direct); AIRE, CHD1, CLK1, EXOSC6, KIAA0101…
SRp30c	SFRS9	8683	Q13242	splicing factor arginine/serine-rich 9.	2 RRM (RNA recognition motif) domains		FUS, ITGB5, MAP1LC3A (IntAct Database); SF3A2 (STRING Database); TRA2B (DIP Database); HABP4, HNRNPUL1, SF3A2 (MINT Database); C1QBP, DUSP11, KHDRBS3, NOL3, RBMY1A1, SAFB, TRA2B, YBX1 (HPRD Database, Direct); KHDRBS3, YTHDC1 (HPRD Database, Complex); C1QBP, DUSP11, HNRNPR, KIAA0101, NCBP1, NOL3, SREK1, TRA2B, UBC, YBX1 (BioGRID Database)
SRp38	SFRS13A	10772	O75494	splicing factor, arginine/serine-rich 13A, RP11-4M23.6, DKFZp686H0644, FLJ30749, FLJ43846, FUSIP1, FUSIP2, NSSR, SFRS13, SRp38, SRrp40, TASR, TASR1, TASR2	1 RRM (RNA recognition motif) domain		GABARAP, GABARAPL2, GRB2, MAP1LC3A, YWHAG, YWHAQ (IntAct Database); FUS, SFRS1, SFRS4, TRA2B, SFN, YWHAB, YWHAG (MINT Database); FUS, SFRS12, SNRNP70, TRA2A, YWHAB, YWHAG (HPRD Database, Direct); FUS, KIAA0101, SFN, SREK1, UBC, YWHAB, YWHAG, YWHAQ (BioGRID Database)
SRp40	SFRS5	6430	Q13243	splicing factor arginine/serine-rich 5, HRS	2 RRM (RNA recognition motif) domains		CD101, ESR1, ESR2, GABARAP, GABARAPL1, GABARAPL2, HDGF, MAPK14, NR3C1, OLFM2, SMAD2, TNK2 (IntAct Database); SF3A2 (STRING Database); CD101, MAPK6, OLFM2, RPS6KA1, SF3A2, SNRPF, SNW1, TNK2 (MINT Database); OLFM2, PPARGC1A, SFRS12, SMURF1, SRPK1, TNK2 (HPRD Database, Direct); PPARGC1A, SFRS4, SFRS6, SRRM1 (HPRD Database, Complex); CALM1, CD101, DYRK1A, KIAA0101, MAPK6, MAPK14, OLFM2, PPARGC1A, RPS…
SRp54	SFRS11	9295	Q05519	splicing factor, arginine/serine-rich 11, p54.	1 RRM (RNA recognition motif) domain		CDK6, CSNK2A1, DDOST, ETS1, GABARAPL2, MME, PUF60, RNPS1, SMAD2, THAP11, YWHAG (IntAct Database); PUF60 (STRING Database); SNW1 (MINT Database); PUF60, RNPS1, SFRS1, SFRS2, TOP1, U2AF2 (HPRD Database, Direct); KIAA0101, MME, PIN1, PUF60, SRSF1, SRSF2, TERF2, TOP1, U2AF2, UBC (BioGRID Database)
SRp55	SFRS6	6431	Q13247	splicing factor arginine/serine-rich 6, B52, MGC5045.	2 RRM (RNA recognition motif) domains		CNBP, ESR1, RNPS1, SRSF4, YWHAG, YWHAQ (IntAct Database); SF3A2 (STRING Database); RBM10, RNPS1, SF3A2, SF3B4, SFRS4, SNW1, TOE1, TRA2B (MINT Database); CLK1, PPARGC1A, RNPS1, SFRS4, SFRS12, SRPK1 (HPRD Database, Direct); PPARGC1A, SFRS4, SFRS5 (HPRD Database, Complex); KIAA0101, PPARGC1A, RNPS1, RRP1B, SREK1, SRPK2, SRRM1, SRSF4, UBC, YWHAQ (BioGRID Database)
SRp75	SFRS4	6429	Q08170	splicing factor arginine/serine-rich 4.	2 RRM (RNA recognition motif) domains		GABARAPL2, HAP1, MAP1LC3A, RNPS1, SRSF6, TICAM1, YWHAG (IntAct Database); SF3A2, SRRM1 (STRING Database); CDC5L, HAP1, HTATSF1, PRPF38A, RNPS1, SART1, SF3A2, SFRS1, SFRS13A, SFRS2, SFRS6, SRRM2, TRA2B (MINT Database); FUS, HAP1, PNN, PPARGC1A, SFRS2IP, SFRS6, SFRS12, SIP1, SMURF1, SMURF2, SRPK1 (HPRD Database, Direct); PPARGC1A, SFRS5, SFRS6, SRRM1 (HPRD Database, Complex); DYRK1A, HAP1, KIAA0101…
TDP43	TARDBP	23435	Q13148	TAR DNA binding protein, ALS10.	2 RRM (RNA recognition motif) domains	Amyotrophic lateral sclerosis type 10 (ALS10) [MIM:612069].	ARF6, EXOSC10, GABARAPL2, HLA-B, MAP1LC3A, MED10, MED19, MED29, NSFL1C, SETDB1, TNFRSF14, TOB1, XRN2, ZHX1 (IntAct Database); EXOSC10, XRN2 (STRING Database); ATXN2 (DIP Database); CDC5L, SNW1 (MINT Database); EXOSC10, NSFL1C, SETDB1, XRN2, ZHX1 (HPRD Database, Direct); EXOSC10, FUS, HDAC6, HNRNPA1, IRAK1, IRAK2, KHDRBS2, KIAA0101, NSFL1C, PABPN1, SETDB1, UBC, VCP, XRN2, ZHX1 (BioGRID Database)
TIA-1	TIA1	7072	P31483	cytotoxic granule-associated RNA binding protein.	3 RRM (RNA recognition motif) domains	Welander Distal Myopathy(WDM) [MIM:604454].	GABARAP, GABARAPL1, GABARAPL2, MAP1LC3A, MAP1LC3B, RICTOR, TOB1 (IntAct Database); DCP1A, HABP4, RC3H2, SND1 (MINT Database); FASTK (HPRD Database, Direct); ELAVL1, HNRNPU, TIAL1 (HPRD Database, Complex); FASTK, RICTOR, UBC (BioGRID Database)
TIAL1	TIAL1	7073	Q01085	TIA1 cytotoxic granule-associated RNA binding protein-like 1, TCBP, TIAR, MGC33401.	3 RRM (RNA recognition motif) domains		GABARAP, GABARAPL1, GABARAPL2, MAP1LC3A, MAP1LC3B (IntAct Database); CDC5L, SMN1, SNW1 (MINT Database); SMN1, SMN2 (HPRD Database, Direct); ELAVL1, HNRNPU, TIA1 (HPRD Database, Complex); KIAA0101, UBC (BioGRID Database)
YB-1	YBX1	4904	P67809	Y box binding protein 1, YB1, BP-8, CSDB, DBPB, CSDA2, NSEP1, NSEP-1, MDR-NF1, MGC104858, MGC110976, MGC117250.	1 CSD (cold-shock) domain		ACTB, APEX1, ARRB1, ARRB2, CBX6, CBX8, CSNK2A1, EIF2C4, EP300, ESR1, GABARAP, GABARAPL2, HLA-C, HNRNPD, IFIT1, IFIT2, IFIT3, IQCB1, JAM2, LCP2, MAP3K14, MAPK13, MYC, PCNT, PPP2R2B, SIRT1, TRAF6, UBE2O, WWTR1 (IntAct Database); CTCF, HABP4, TFAP2A, TP53 (STRING Database); PPM1G (DIP Database); CUL1, EIF2C1, EIF2C2, FBXO33, GSK3B, HABP4, LSM3, MAP3K14, MAPK1, PITX2, RPS27A, SKP1, SMU1, YWHAZ (MINT …
ZRANB2	ZRANB2	9406	O95218	zinc finger, RAN-binding domain containing 2, ZIS, ZIS1, ZIS2, ZNF265, FLJ41119, DKFZp686J183, DKFZp686N09117.	2 RanBP2-type zinc fingers		AKAP17A, ARRB1, ARRB2, KIF20A (IntAct Database); EP300, SFRS2, SFRS12, SFRS17A, SMN1, SNRNP70, U2AF1, YY1 (HPRD Database, Direct); DDB1, HADHA, HSPA1L, HSPA5, HSPA8, NF2, VPRBP (HPRD Database, Complex); ARRB1, EMD, SNRNP70, SREK1, TRA2B, U2AF1, UBC (BioGRID Database)
HuC	ELAVL3	1995	Q14576	ELAV (embryonic lethal, abnormal vision, Drosophila)-like 3 (Hu antigen C), HUC, HUCL, PLE21, MGC20653, DKFZp547J036	3 RRM (RNA recognition motif) domains		A2M, CDC37, ECSIT, EWSR1, MAST1, NOS3, RNF32 (IntAct Database); EWSR1 (MINT Database); ELAVL2, EWSR1 (HPRD Database, Direct); EWSR1 (BioGRID Database)
RBM5	RBM5	10181	P52756	RNA binding motif protein 5, G15, H37, RMB5, LUCA15, FLJ39876	1 C2H2-type zinc finger; 1 G-patch domain; 1 RanBP2-type zinc finger; 2 RRM (RNA recognition motif) domains		RIF1 (IntAct Database); SF3A2 (STRING Database); BCL2L1, C1orf103, DHX15, GAPDH, ILF3, NAA38, PRPF8, PRPF19, SF3A2, SNRNP200, SR140, U2AF2, WBP11, WDR77 (MINT Database); C1orf103 (HPRD Database, Direct); BCL2L1, GAPDH, LRIF1 (BioGRID Database)
hnRNP Q	SYNCRIP	10492	O60506	synaptotagmin binding cytoplasmic RNA interacting protein, PP68, NSAP1, GRYRBP, HNRPQ1, GRY-RBP, hnRNP-Q, FLJ31626, dJ3J17.2	3 RRM (RNA recognition motif) domains		CNBP, ESR1, GABARAP, GABARAPL1, GABARAPL2, H2AFX, HLA-B, HMGA1, HNRNPD, IKBKE, MAP1LC3A, MAP1LC3B, PRKAB1, PRKRA, PRMT8, PUF60, SIRT1, SMG1, STK24, TP63 (IntAct Database); A1CF, HNRNPD, SF3A2 (STRING Database); APEX1, EEF1A1, EEF2, EIF2C1, EP300, HABP4, HNRNPK, HNRNPR, HNRNPU, HSPA1B, ILF2, ILF3, MCM2, MCM3, MCM4, MCM5, MCM6, MCM7, MORF4L1, MORF4L2, MRE11A, ORC2L, PRKDC, RAD50, RUVBL1, RUVBL2, SF…
hnRNP A3	HNRNPA3	220988	P51991	heterogeneous nuclear ribonucleoprotein A3, FBRNP, HNRPA3, D10S102, MGC138232, MGC142030, 2610510D13Rik.	2 RRM (RNA recognition motif) domains		ARHGDIA, ARRB1, ATG12, CNBP, ESR1, GABARAP, GABARAPL1, GABARAPL2, HDGF, IFIT3, MAP1LC3A, MAP1LC3B, POLR1E, PUF60, RIPK2, SMAD2, STK24, TNIK, TOP1, TP63 (IntAct Database); SF3A2 (STRING Database); SF3A2, SNW1 (MINT Database); SFRS12 (HPRD Database, Direct); DDX17, DDX23, DDX5, DHX9, EFTUD2, ELAVL1, FBL, H1FX, HIST1H1C, HNRNPA1, HNRNPA2B1, HNRNPC, HNRNPK, HNRNPL, HNRNPR, HNRNPU, MKI67, NAT10, NCL, …
QKI	QKI	9444	Q96PU8	QKI KH domain containing RNA binding, QK, Hqk, QK1, QK3, hqkI, DKFZp586I0923.	1 KH domain		DEPP, FUBP3, HCLS1, HNRNPK, PCBP1, PCBP2, PCBP4, PSMF1, PTBP1, PTBP2, RBFOX1, RBFOX2, RBM14, RBPMS, RNF138, SERF2, THAP1, USH1C, USP30 (IntAct Database); DEPP, FOX1, FUBP3, HCLS1, HNRNPH2, HNRNPK, HYPK, PCBP1, PCBP2, PCBP4, PSMF1, PTBP1, PTBP2, RALY, RBM14, RBM23, RBM9, RBPMS, RNF138, THAP1, U2AF2, USH1C, WDR77 (MINT Database); C10orf10, DAZ4, FOX1, FUBP3, HCLS1, HNRNPK, PCBP1, PCBP2, PCBP4, PRMT…
hnRNP G	RBMX	27316	P38159	RNA binding motif protein X-linked, RNMX, HNRPG, RBMXP1, RBMXRT, hnRNP-G.	1 RRM (RNA recognition motif) domain		CCDC33, CIRBP, CNBP, CSNK2A1, ESR1, FAM103A1, FXR2, FUS, HNRNPK, IFIT3, JAK2, KHDRBS1, KHDRBS2, KHDRBS3, LNX1, MAP1LC3A, MAP1LC3B, NFE2L2, NR2F6, RB1CC1, RBM7, SOCS3, SORBS3, STAT5A, USP45 (IntAct Database); HNRNPK, KHDRBS2, SF3A2, TRA2B (STRING Database); TRA2B (DIP Database); CDC5L, HNRNPK, SF3A2, SNW1, TRA2B (MINT Database); CCDC33, CIRBP, FAM103A1, FXR2, HNRNPK, KHDRBS2, KHDRBS3, LNX1, PSMF1,…
SRm160	SRRM1	10250	Q8IYB3	serine/arginine repetitive matrix 1, POP101, SRM160, MGC39488, 160-KD.	1 PWI domain		ABI1, ESR1, NXF1, RNPS1, SPOP, UPF1, UPF2, UPF3A, YWHAG (IntAct Database); CDC5L, DEK, RBM8A, SRRM2, SRSF4 (STRING Database); CDC5L, SNW1, YWHAG (MINT Database); DEK, FUS, SRPK1, SRRM2, YWHAG (HPRD Database, Direct); BCAS2, BCLAF1, CDC5L, CWC15, DEK, GCN1L1, ILF2, KDM3B, MAP1S, NCBP1, NXF1, PIN1, PLRG1, PPM1D, PRKDC, PRPF19, RBM8A, RBMX, RBMXL2, RNPS1, RPL12, RPL13, RPS16, RPS25, SF3A1, SF3B2, SF…
ESRP1	ESRP1	54845	Q6NXG1	epithelial splicing regulatory protein 1, RBM35A, RMB35A, FLJ20171	3 RRM (RNA recognition motif) domains		UBC (BioGRID Database)
ESRP2	ESRP2	80004	Q9H6T0	epithelial splicing regulatory protein 2, RBM35B, FLJ21918, FLJ22248	3 RRM (RNA recognition motif) domains		NUMBL (IntAct Database)
